# Supplementary material for: Biomineral-binding liposomes with dual antibacterial effects for preventing and treating dental caries
Source: Royal Society of Chemistry journal article supplement (doi:10.1039/d3bm00756a), 2023-01-01
Supplement: d3bm00756a1.pdf [file d3bm00756a1.pdf]

## Supplementary Material

### **Biomineral-binding liposomes with dual antibacterial effects for preventing and treating dental caries**

#### **Supplementary methods**

##### *1 Acidogenicity*

The effect of Mag and FLC on the acidogenicity of *S. mutans* or *C. albicans* was evaluated by glycolytic pH drop analysis. *S. mutans* was inoculated into BHI broth (pH 7.4) and *C. albicans* into SDB (pH 7.4) containing 1% (w/v) glucose. CHG was used as the positive control and the culture medium as the negative control. Serial 2-fold dilutions of Mag and FLC at concentrations from 0.125 MIC to 2 MIC were then added, and the pH value was measured after 0, 4, 6, 8, 12, and 24 h at 37 °C. The acidogenicity of *S. mutans* treated with blank LPs, Mag-LPs, or PPI-Mag-LPs was examined by fixing the concentration of Mag at the MIC value. Similarly, the acidogenicity of *C. albicans* treated with blank LPs, Mag/FLC-LPs, or PPI-Mag/FLC-LPs was determined by fixing the concentrations of Mag and FLC at the synergistic MIC value.

##### *2 Acid resistance detection*

The tolerance of *S. mutans* and *C. albicans* to acidic conditions was assessed by determining their viability at different pH values. Briefly, *S. mutans* was inoculated into BHI broth and *C. albicans* into SDB at pH 4.0, 4.5, 5.0, 5.5, 6.0, 6.5 and 7.0, then they were incubated at 37 °C for 24 h. The growth rate of both microorganisms was determined by measuring the absorbance at 600 nm. Culture medium at pH 7.4 served as the control.

## Supplementary results

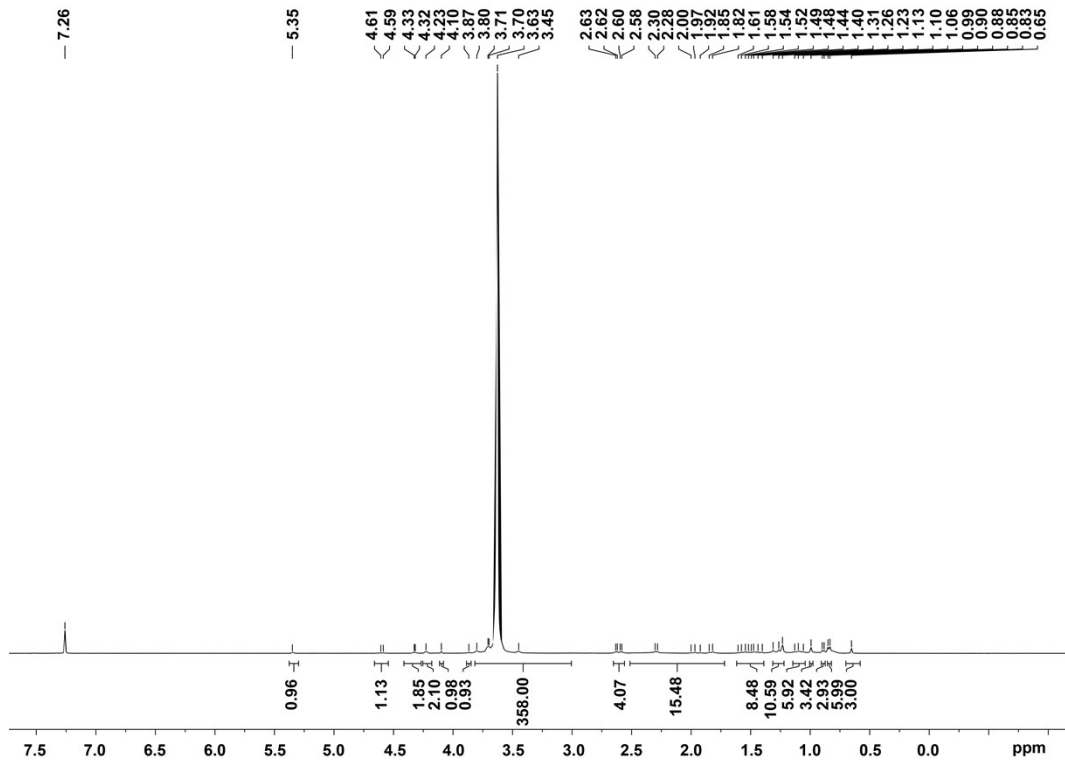

**Fig. S1.**  $^1\text{H}$  NMR spectrum of CHEMS-PEG<sub>2000</sub>-BA. The compound CHEMS-PEG<sub>2000</sub>-BA was dissolved in deuterated chloroform, and the proton peak of CHEMS-PEG<sub>2000</sub>-BA was analyzed by NMR (400 MHz).

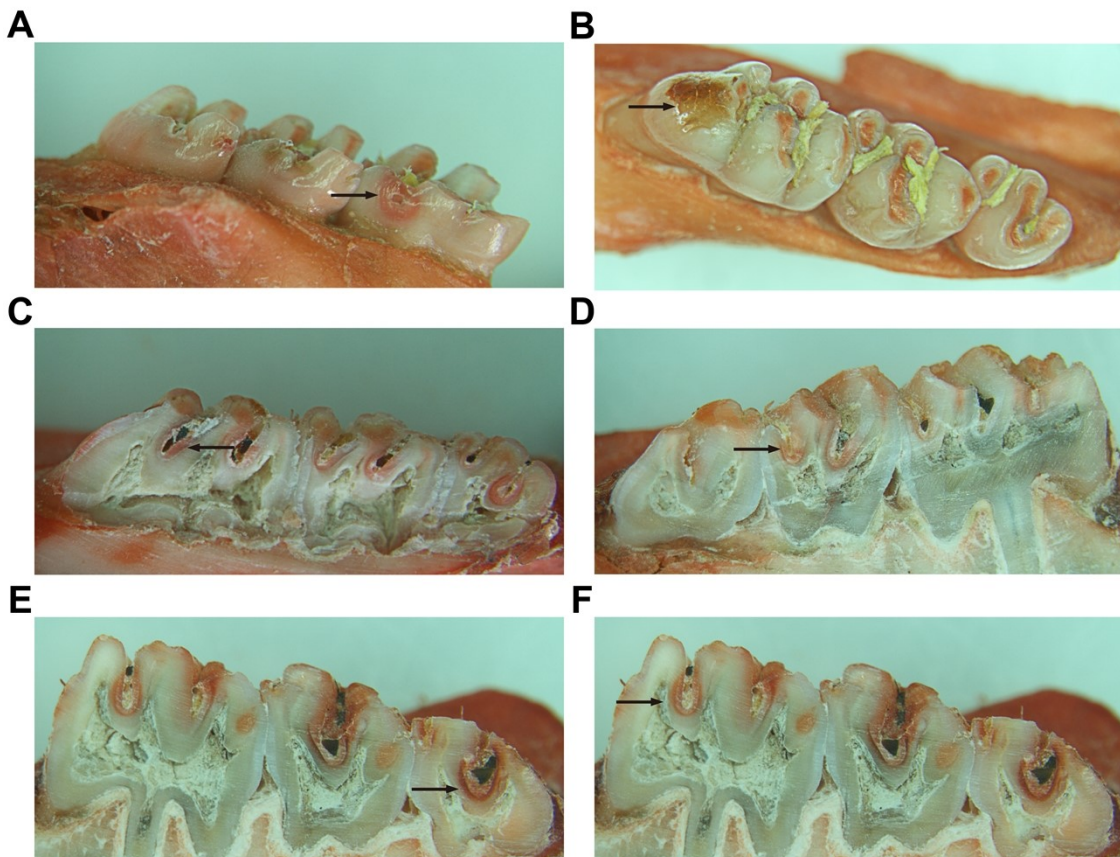

**Fig. S2.** Stereomicroscopic images of murexide-dyed molars collected from dental caries rats.

(A-C) Enamel caries on the (A) smooth, (B) proximal, and (C) sulcal molar surface. (D) Slight, (E) moderate, and (F) extensive dentin caries on the sulcal surface. Arrows indicate the respective descriptions.

### ***Acidogenicity***

The effect of Mag and FLC on the acidogenicity of *S. mutans* or *C. albicans* was evaluated by glycolytic pH drop analysis. *S. mutans* was inoculated into BHI broth (pH 7.4) and *C. albicans* into SDB (pH 7.4) containing 1% (w/v) glucose. CHG was used as the positive control and the culture medium as the negative control. Serial 2-fold dilutions of Mag and FLC at concentrations from 0.125 MIC to 2 MIC were then added, and the pH value was measured after 0, 4, 6, 8, 12, and 24 h at 37 °C. The acidogenicity of *S. mutans* treated with blank LPs, Mag-LPs, or PPI-Mag-LPs was examined by fixing the concentration of Mag at the MIC value. Similarly, the acidogenicity of *C. albicans* treated with blank LPs, Mag/FLC-LPs, or PPI-Mag/FLC-LPs was determined by fixing the concentrations of Mag and FLC at the synergistic MIC value.

Mag suppressed the acidogenicity of *S. mutans* in a concentration-dependent manner, reaching an inhibition rate as high as 92.07% ( $\pm$  2.26) after 6 h of treatment at 1 MIC (**Fig. S3 A-B**). When the concentration of Mag was set at 7.8  $\mu$ g/mL, PPI-Mag-LPs inhibited the acidogenicity of *S. mutans* to a similar extent as free Mag (**Fig. S3 C-D**). Similarly, synergistic treatment with Mag and FLC suppressed the ability of *C. albicans* to produce organic acids in a concentration-dependent manner, reaching a maximum inhibition rate of 94.26% ( $\pm$  3.19) after 4 h of treatment at a synergistic concentration of 1 MIC (**Fig. S3 E-F**). When the synergistic concentration of Mag and FLC was set at 15.6  $\mu$ g/mL, PPI-Mag/FLC-LPs showed an inhibitory effect similar to that of the mixture of free Mag and FLC (**Fig. S3G-H**).

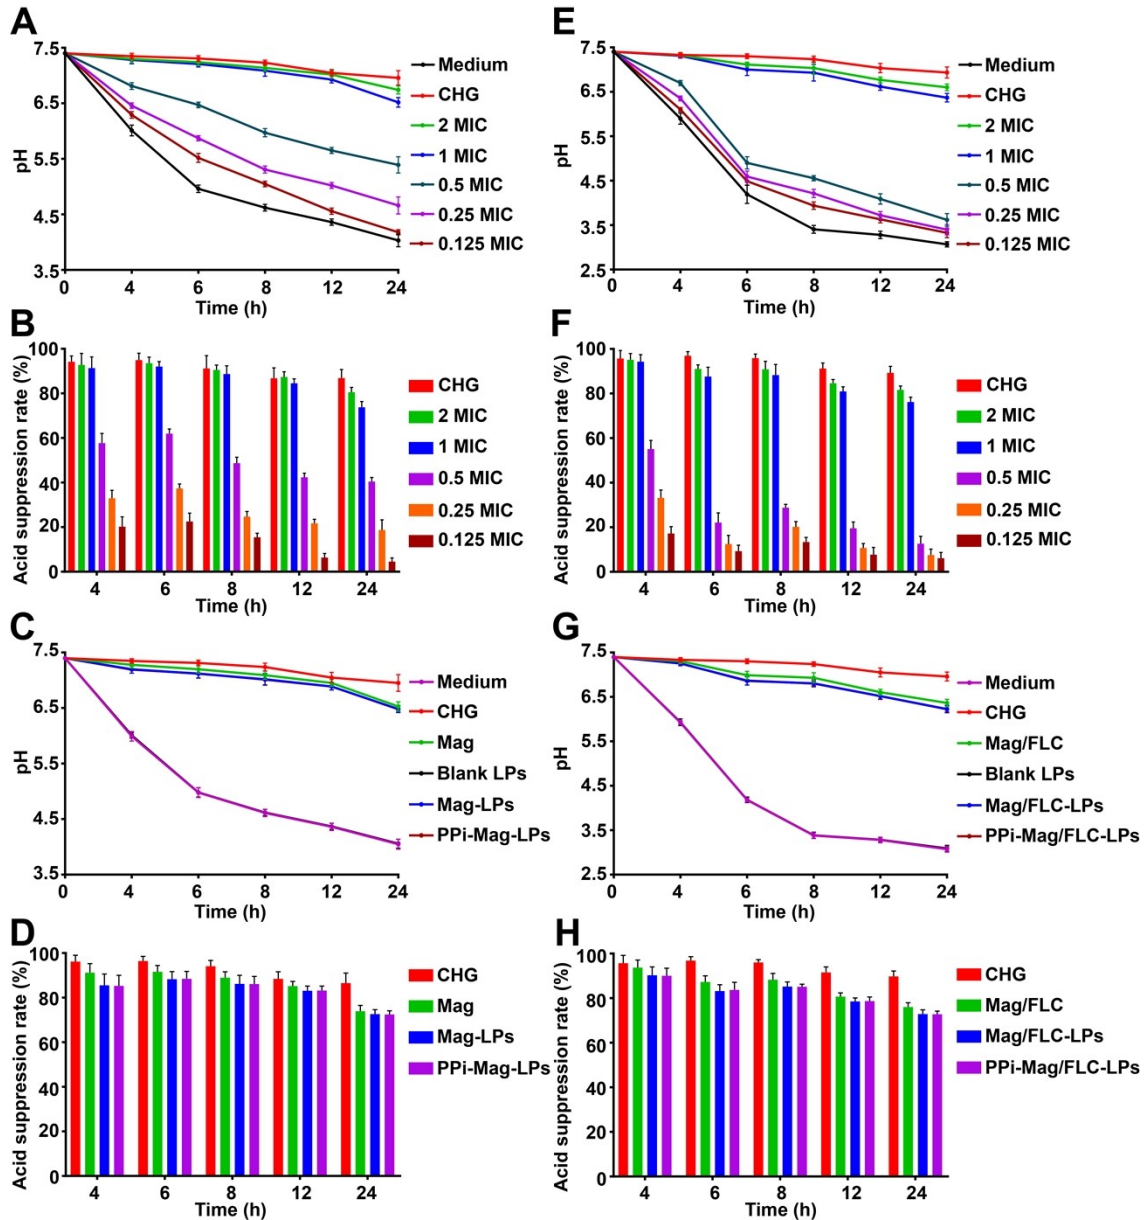

**Fig. S3.** Effects of formulations on the acidogenicity of *S. mutans* and *C. albicans*. (A-B) Inhibitory effect of Mag (0.125 MIC - 2 MIC) on the acidogenicity of *S. mutans*. (C-D) Inhibitory effect of different formulations (Mag, 7.8  $\mu\text{g}/\text{mL}$ ) on the acidogenicity of *S. mutans*. (E-F) Synergistic inhibitory effect of Mag and FLC (0.125 MIC - 2 MIC) on the acidogenicity of *C. albicans*. (G-H) Inhibitory effect of different formulations (Mag, 15.6  $\mu\text{g}/\text{mL}$ ; FLC, 15.6  $\mu\text{g}/\text{mL}$ ) on the acidogenicity of *S. mutans*. Data are shown as mean  $\pm$  SD (n = 3). \*\*\*\* $P < 0.0001$ . CHG, chlorhexidine gluconate; FLC, fluconazole; LPs, liposomes; Mag, magnolol; MIC, minimum inhibitory concentration; PPI, pyrophosphate ion.

### Acid resistance

The tolerance of *S. mutans* and *C. albicans* to acidic conditions was assessed by determining their viability at different pH values. Briefly, *S. mutans* was inoculated into BHI broth and *C. albicans* into SDB at pH 4.0, 4.5, 5.0, 5.5, 6.0, 6.5 and 7.0, then they were

incubated at 37 °C for 24 h. The growth rate of both microorganisms was determined by measuring the absorbance at 600 nm. Culture medium at pH 7.4 served as the control.

The growth of *S. mutans* and *C. albicans* was not affected at pH 7.0, 6.5 or 6.0, whereas significant inhibition was observed at pH 4.0, 4.5 and 5.0 relative to pH 7.4 (**Fig. S4**). In addition, the growth of *S. mutans* but not *C. albicans* was significantly inhibited at pH 5.5, suggesting that *C. albicans* is more acid-tolerant.

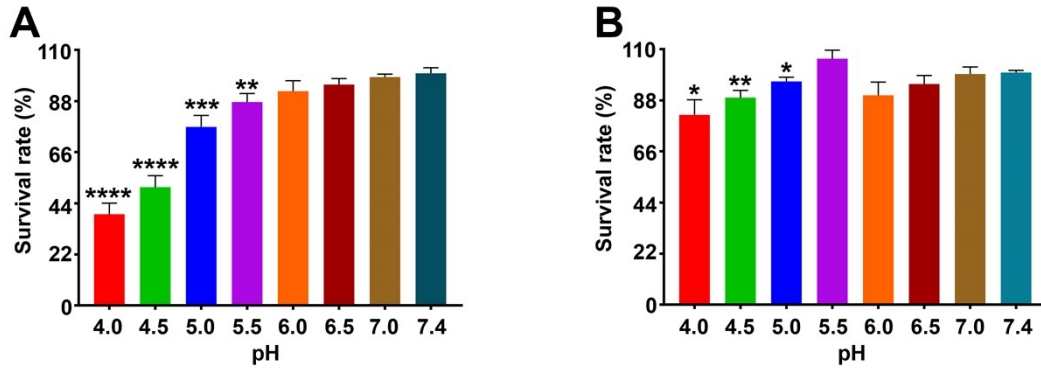

**Fig. S4.** Aciduricity of *S. mutans* and *C. albicans*. Survival rate of (A) *S. mutans* and (B) *C. albicans* at different pH values. Data are shown as mean  $\pm$  SD (n = 5). \* $P < 0.05$ , \*\* $P < 0.001$ , \*\*\* $P < 0.001$ , \*\*\*\* $P < 0.0001$  vs pH 7.4.

**Table S1.** Actual values of independent variables at different levels.

| Independent variable | Level  |        |        |        |        |
|----------------------|--------|--------|--------|--------|--------|
|                      | -1.732 | -1     | 0      | +1     | +1.732 |
| X <sub>1</sub>       | 160.00 | 176.91 | 200.00 | 223.09 | 240.00 |
| X <sub>2</sub>       | 0.12   | 0.20   | 0.31   | 0.42   | 0.50   |
| X <sub>3</sub>       | 2.00   | 4.11   | 7.00   | 9.89   | 12.00  |

X<sub>1</sub>, weight of phosphatidylethanolamine (mg); X<sub>2</sub>, oil/aqueous ratio; X<sub>3</sub>, duration of ultrasonication (min).

**Table S2.** Experimental results of the central composite design (n = 3).

| Run | X <sub>1</sub> | X <sub>2</sub> | X <sub>3</sub> | Y <sub>1</sub> | Y <sub>2</sub> | Y <sub>3</sub> |
|-----|----------------|----------------|----------------|----------------|----------------|----------------|
| 1   | 176.91         | 0.20           | 9.89           | 44.03          | 35.95          | 260.10         |
| 2   | 176.91         | 0.20           | 4.11           | 58.92          | 50.26          | 248.36         |
| 3   | 200.00         | 0.50           | 7.00           | 38.05          | 30.97          | 234.83         |
| 4   | 223.09         | 0.42           | 9.89           | 62.16          | 53.05          | 255.27         |
| 5   | 200.00         | 0.31           | 7.00           | 88.91          | 76.89          | 218.07         |
| 6   | 200.00         | 0.31           | 7.00           | 89.02          | 78.45          | 216.46         |
| 7   | 176.91         | 0.42           | 4.11           | 68.74          | 59.49          | 248.36         |
| 8   | 200.00         | 0.31           | 2.00           | 86.51          | 75.82          | 281.20         |
| 9   | 200.00         | 0.31           | 7.00           | 86.42          | 76.17          | 217.16         |
| 10  | 240.00         | 0.31           | 7.00           | 58.71          | 50.08          | 249.97         |
| 11  | 223.09         | 0.42           | 4.11           | 75.24          | 62.85          | 240.53         |
| 12  | 160.00         | 0.31           | 7.00           | 49.67          | 40.45          | 234.63         |
| 13  | 176.91         | 0.42           | 9.89           | 53.05          | 46.82          | 264.16         |
| 14  | 223.09         | 0.20           | 9.89           | 50.16          | 42.86          | 252.26         |
| 15  | 200.00         | 0.31           | 12.00          | 35.36          | 29.39          | 269.93         |
| 16  | 200.00         | 0.31           | 7.00           | 88.15          | 78.21          | 218.33         |
| 17  | 223.09         | 0.20           | 4.11           | 65.13          | 54.24          | 243.86         |
| 18  | 200.00         | 0.13           | 7.00           | 44.53          | 37.73          | 226.20         |
| 19  | 200.00         | 0.31           | 7.00           | 87.74          | 76.53          | 216.73         |
| 20  | 200.00         | 0.31           | 7.00           | 87.97          | 76.46          | 218.60         |

X<sub>1</sub>, weight of phosphatidylethanolamine (mg); X<sub>2</sub>, oil/aqueous ratio; X<sub>3</sub>, duration of ultrasonication (min); Y<sub>1</sub>, encapsulation efficiency of magnolol (%); Y<sub>2</sub>, encapsulation efficiency of fluconazole (%); Y<sub>3</sub>, particle size (nm).

**Table S3.** Observed and predicted values of particle size and encapsulation efficiency under optimal formulation conditions (n = 3).

| Variable       | Optimized value | Response       | Predicted value | Observed value          | Mean value (± SD)  |
|----------------|-----------------|----------------|-----------------|-------------------------|--------------------|
| X <sub>1</sub> | 215.4           | Y <sub>1</sub> | 88.38           | 88.21<br>88.34<br>86.44 | 87.66% (± 1.06)    |
| X <sub>2</sub> | 0.32            | Y <sub>2</sub> | 76.89           | 74.82<br>75.68<br>76.14 | 75.53% (± 0.67)    |
| X <sub>3</sub> | 6.06            | Y <sub>3</sub> | 222.84          | 222.6<br>217.2<br>221.3 | 220.37 nm (± 2.82) |

X<sub>1</sub>, weight of phosphatidylethanolamine (mg); X<sub>2</sub>, oil/aqueous ratio; X<sub>3</sub>, duration of ultrasonication (min);

Y<sub>1</sub>, encapsulation efficiency of magnolol (%); Y<sub>2</sub>, encapsulation efficiency of fluconazole (%); Y<sub>3</sub>, particle size (nm).

**Table S4.** Stability of blank LPs, Mag/FLC-LPs, and PPI-Mag/FLC-LPs at 4 °C.

| Sample          | Days | Particle size (nm) | Polydispersity index | EE (Mag)     | EE (FLC)     |
|-----------------|------|--------------------|----------------------|--------------|--------------|
| Blank LPs       | 0    | 184.33 ± 1.98      | 0.143 ± 0.006        | -            | -            |
|                 | 5    | 184.57 ± 1.80      | 0.146 ± 0.005        | -            | -            |
|                 | 10   | 185.80 ± 2.19      | 0.148 ± 0.009        | -            | -            |
| Mag/FLC-LPs     | 0    | 219.53 ± 1.80      | 0.122 ± 0.006        | 85.83 ± 1.08 | 74.40 ± 0.82 |
|                 | 5    | 221.33 ± 1.91      | 0.123 ± 0.006        | 85.78 ± 0.71 | 74.29 ± 1.15 |
|                 | 10   | 222.27 ± 2.48      | 0.125 ± 0.008        | 85.71 ± 0.60 | 74.17 ± 0.87 |
| PPI-Mag/FLC-LPs | 0    | 238.83 ± 2.33      | 0.164 ± 0.005        | 87.21 ± 1.06 | 75.17 ± 1.25 |
|                 | 5    | 239.47 ± 2.51      | 0.166 ± 0.005        | 86.91 ± 1.02 | 74.83 ± 0.90 |
|                 | 10   | 241.93 ± 2.27      | 0.170 ± 0.004        | 86.84 ± 0.75 | 74.57 ± 0.81 |

Data are shown as mean ± SD. EE, encapsulation efficiency (%); FLC, fluconazole; LPs, liposomes; Mag, magnolol; PPI, pyrophosphate ion.

**Table S5.** Stability of blank LPs, Mag/FLC-LPs, and PPI-Mag/FLC-LPs at 25 °C.

| Sample          | Days | Particle size (nm) | Polydispersity index | EE (Mag)     | EE (FLC)     |
|-----------------|------|--------------------|----------------------|--------------|--------------|
| Blank LPs       | 0    | 184.33 ± 1.98      | 0.143 ± 0.006        | -            | -            |
|                 | 5    | 334.77 ± 3.01      | 0.456 ± 0.018        | -            | -            |
|                 | 10   | -                  | -                    | -            | -            |
| Mag/FLC-LPs     | 0    | 219.53 ± 1.80      | 0.122 ± 0.006        | 85.83 ± 1.08 | 74.40 ± 0.82 |
|                 | 5    | 414.50 ± 3.40      | 0.676 ± 0.031        | 72.80 ± 0.84 | 63.70 ± 0.76 |
|                 | 10   | -                  | -                    | 56.21 ± 0.95 | 48.73 ± 1.09 |
| PPI-Mag/FLC-LPs | 0    | 238.83 ± 2.33      | 0.164 ± 0.005        | 87.21 ± 1.06 | 75.17 ± 1.25 |
|                 | 5    | 451.53 ± 2.95      | 0.707 ± 0.049        | 71.52 ± 0.71 | 60.78 ± 0.83 |
|                 | 10   | -                  | -                    | 52.10 ± 0.51 | 43.82 ± 0.69 |

Data are shown as mean ± SD. EE, encapsulation efficiency (%); FLC, fluconazole; LPs, liposomes; Mag, magnolol; PPI, pyrophosphate ion.

**Table S6.** Long-term stability of blank LPs, Mag/FLC-LPs, and PPI-Mag/FLC-LPs at 4 °C.

| Sample          | Months | Particle size (nm) | Polydispersity index | EE (Mag)     | EE (FLC)     |
|-----------------|--------|--------------------|----------------------|--------------|--------------|
| Blank LPs       | 0      | 183.73 ± 2.06      | 0.144 ± 0.004        | -            | -            |
|                 | 1      | 185.90 ± 2.34      | 0.154 ± 0.005        | -            | -            |
|                 | 2      | 188.40 ± 2.86      | 0.173 ± 0.011        | -            | -            |
|                 | 3      | 192.03 ± 3.25      | 0.204 ± 0.018        | -            | -            |
| Mag/FLC-LPs     | 0      | 219.33 ± 2.17      | 0.121 ± 0.006        | 85.86 ± 1.02 | 74.38 ± 1.39 |
|                 | 1      | 223.17 ± 2.66      | 0.132 ± 0.004        | 85.64 ± 1.04 | 74.21 ± 1.08 |
|                 | 2      | 227.67 ± 3.45      | 0.156 ± 0.014        | 84.73 ± 0.82 | 73.53 ± 0.88 |
|                 | 3      | 291.53 ± 3.71      | 0.304 ± 0.017        | 73.93 ± 1.43 | 62.27 ± 1.78 |
| PPI-Mag/FLC-LPs | 0      | 239.27 ± 2.11      | 0.163 ± 0.006        | 86.92 ± 0.73 | 74.98 ± 0.92 |
|                 | 1      | 243.63 ± 2.68      | 0.177 ± 0.007        | 86.65 ± 0.64 | 74.58 ± 1.18 |
|                 | 2      | 248.07 ± 3.32      | 0.201 ± 0.015        | 85.30 ± 1.04 | 73.06 ± 1.30 |
|                 | 3      | 315.97 ± 3.20      | 0.315 ± 0.012        | 71.30 ± 2.21 | 60.69 ± 1.46 |

Data are shown as mean ± SD. EE, encapsulation efficiency (%); FLC, fluconazole; LPs, liposomes; Mag, magnolol; PPI, pyrophosphate ion.
